# Supplementary material
Source: PubMed Central journal article supplement (PMC4422755)
Supplement: NIHMS62103-supplement-Supplement.pdf [file NIHMS62103-supplement-Supplement.pdf]

**COMPARISON OF RP-HPLC MODES TO ANALYSE THE N-GLYCOME OF THE FREE-LIVING NEMATODE *PRISTIONCHUS PACIFICUS***

Shi Yan, Iain B. H. Wilson and Katharina Paschinger

Supplementary Data

**Supplementary Figure 1. Fragmentation patterns of Man<sub>8</sub>GlcNAc<sub>2</sub> isomers:** The MALDI-TOF MS/MS spectra for the two isomers of Man<sub>8</sub>GlcNAc<sub>2</sub> found in different RP-HPLC fractions of the pyridylamino-labelled pool of the *Pristionchus* PNGase F released N-glycans (A, B) are compared to a standard Man<sub>8</sub>B (generated by the action of *Caenorhabditis elegans* ER mannosidase on commercial Man<sub>9</sub>GlcNAc<sub>2</sub>; C) and the Man<sub>8</sub>A isomer isolated from *Dictyostelium discoideum* (D). The latter two spectra are also presented in Supplementary Figure 4 of Ref. 32. The different branches (A, B and C) of the Man<sub>8</sub> structure are also annotated as are the RP-HPLC glucose unit values given by Tomiya *et al* in their 1991 paper (Ref. 41). Note the absence of the *m/z* 1151 fragment from Man<sub>8</sub>A, which instead has an *m/z* 989 fragment; this pattern is interpreted as indicating loss of the  $\alpha$ 1,6-antenna (B and C branches) during MS/MS.

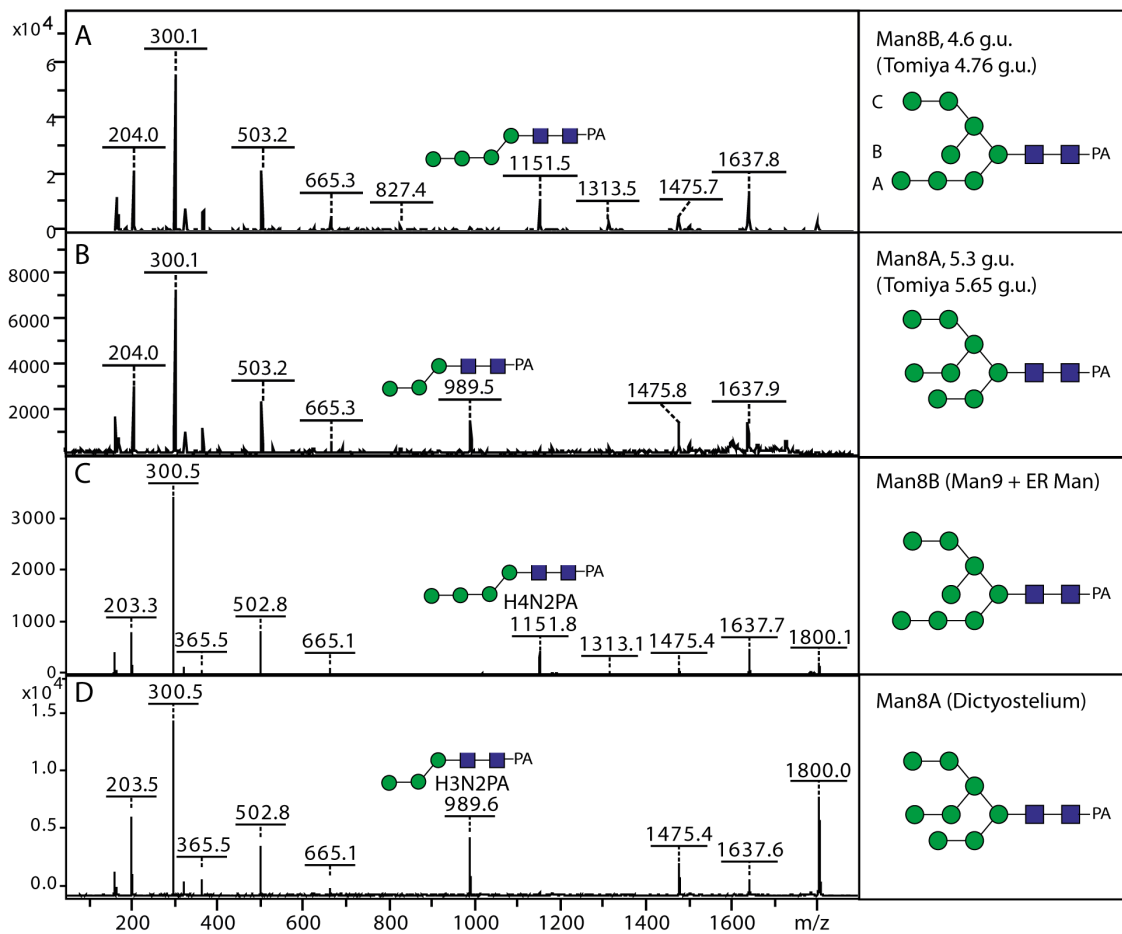

**Supplementary Figure 2. Exoglycosidase and chemical treatments of monofucosylated N-glycans:** The effect of hydrofluoric acid (*B* and *G*), bovine  $\alpha$ -fucosidase (*D* and *F*) or *Aspergillus*  $\beta$ -galactosidase (*I*) on four different monofucosylated pyridylamino-labelled *Pristionchus* N-glycans ( $\text{Hex}_{2-4}\text{GlcNAc}_2\text{Fuc}_1$ ) as shown by MALDI-TOF MS. Note that the  $\alpha 1,3$ -fucose on the proximal or distal GlcNAc residues is sensitive to HF, whereas  $\alpha 1,6$ -fucose on the proximal GlcNAc is sensitive to bovine  $\alpha$ -fucosidase (the relevant panel *D* is the non-magnified version of Figure 6E) and the galactose attached to core fucose is lost upon *Aspergillus* galactosidase treatment; loss of the relevant  $m/z$  446 or 608 core fragments was confirmed. Other data on hydrofluoric acid, fucosidase and galactosidase sensitivities of related structures are shown in Figure 5 and 6 of the main text. The annotated MS/MS spectra of the original glycans *A* ( $m/z$  1135), *C* ( $m/z$  1135), *E* ( $m/z$  973) and *H* ( $m/z$  1297) are shown in Figure 4 (panels A, B, C and G) of the main text.

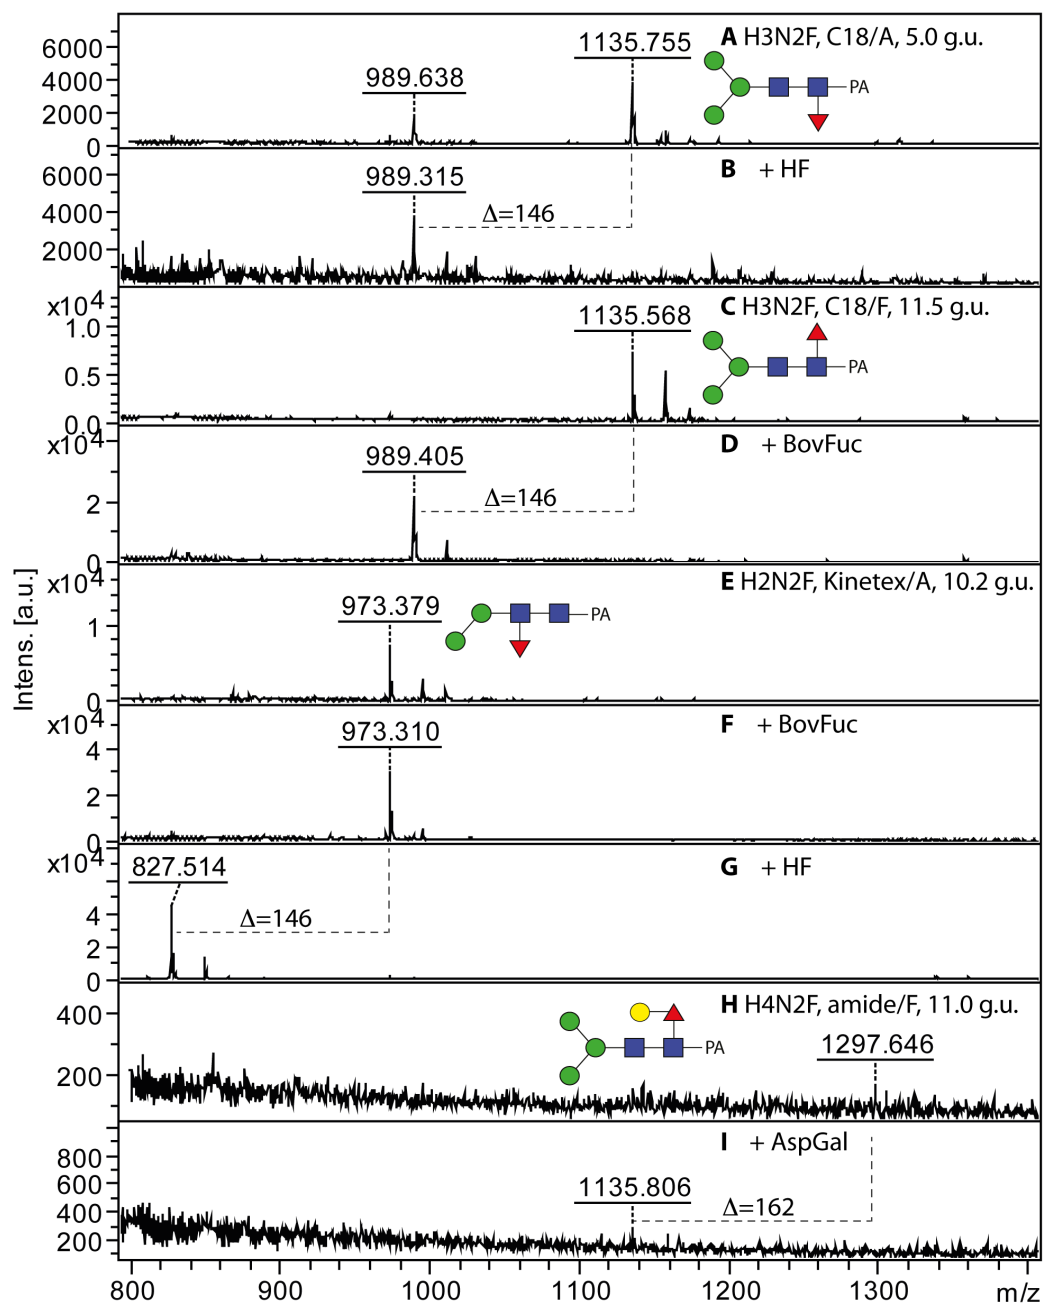

**Supplementary Figure 3. Fragmentation patterns of fucosylated pyridylamino-labelled N-glycans:** MS/MS spectra for the three differently-eluting isomers of  $\text{Man}_1\text{GlcNAc}_2\text{Fuc}_1$  ( $m/z$  811; A-C), three isomers of  $\text{Man}_1\text{GlcNAc}_2\text{Fuc}_2$  ( $m/z$  957; D-F) and five isomers of  $\text{Man}_2\text{GlcNAc}_2\text{Fuc}_1$  ( $m/z$  973; G-K) from *Pristionchus* (panel I is also as shown in Figure 4C of the main text). As mentioned in the main text:  $\alpha$ 1,6-fucosylation of the reducing-terminal proximal GlcNAc results in strong  $m/z$  446 fragments (C, F, J, K),  $\alpha$ 1,3-fucosylation of the proximal GlcNAc results in  $m/z$  300 and 446 fragments of approximately equal intensity (A, G, H), difucosylation of the proximal GlcNAc results in  $m/z$  446 and 592 fragments of approximately equal intensity (E) and  $\alpha$ 1,3-fucosylation of the distal (second core) GlcNAc is often associated with weak (trace)  $m/z$  446 fragments resulting from a low level of fucose rearrangement (B, D). Loss of one fucose from the parent ion is indicated by ‘F’.

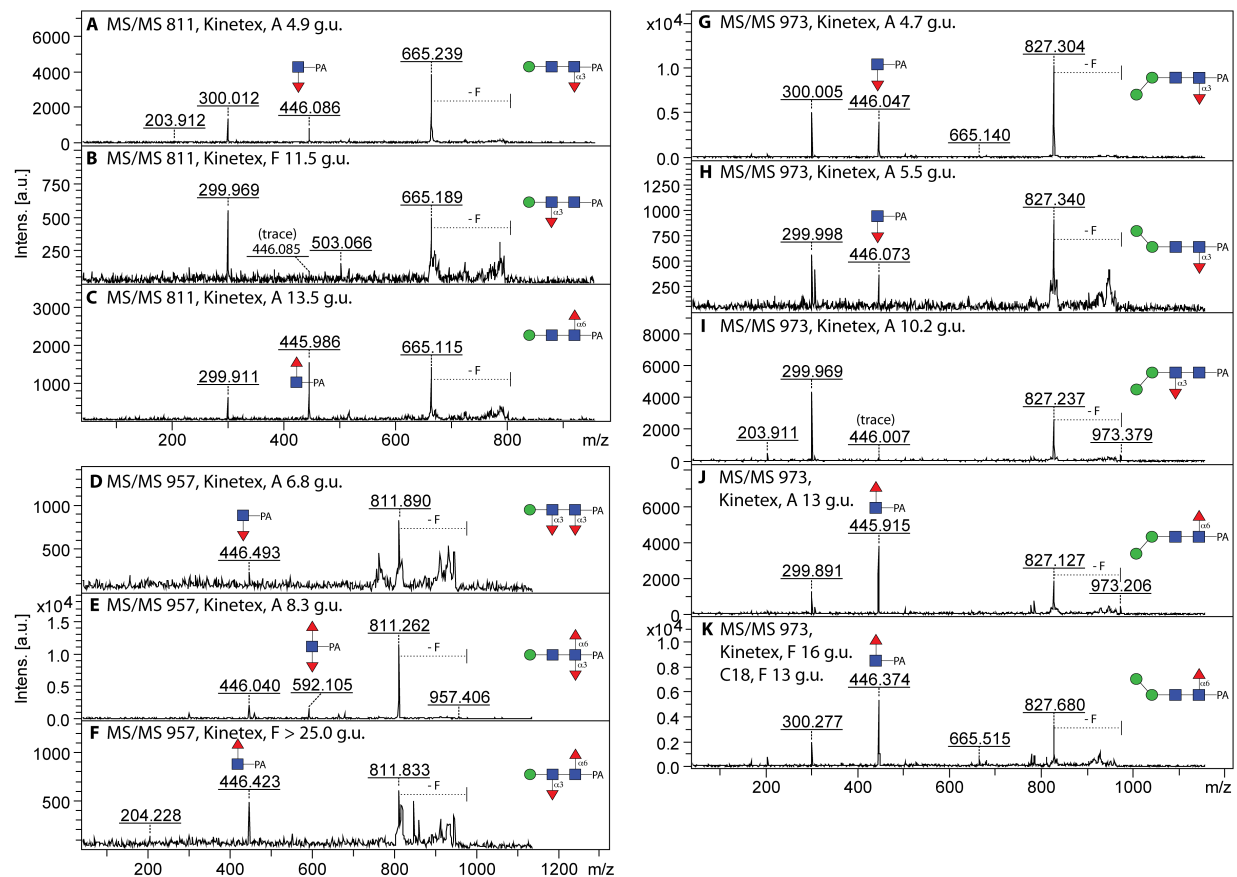

**Supplementary Figure 4. MALDI-TOF MS/MS analysis of triantennary N-glycans modified with one or two phosphorylcholine residues.** Further examples of the fragmentation patterns of phosphorylcholine-modified pyridylamino-labelled N-glycans from *Pristionchus*, including two isomers each of Hex<sub>3</sub>HexNAc<sub>5</sub>Fuc<sub>0-1</sub>PC<sub>2</sub>. The overall predicted structures are shown with an indication of the predicted fragmentation position for the diagnostic *m/z* 734 and 899 ions (panel A is a further version of Figure 8E in the main text). Losses of either the core GlcNAc-PA or GlcNAcFuc-PA or an antennal GlcNAc-PC is indicated by the loss of 299, 445 or 368.

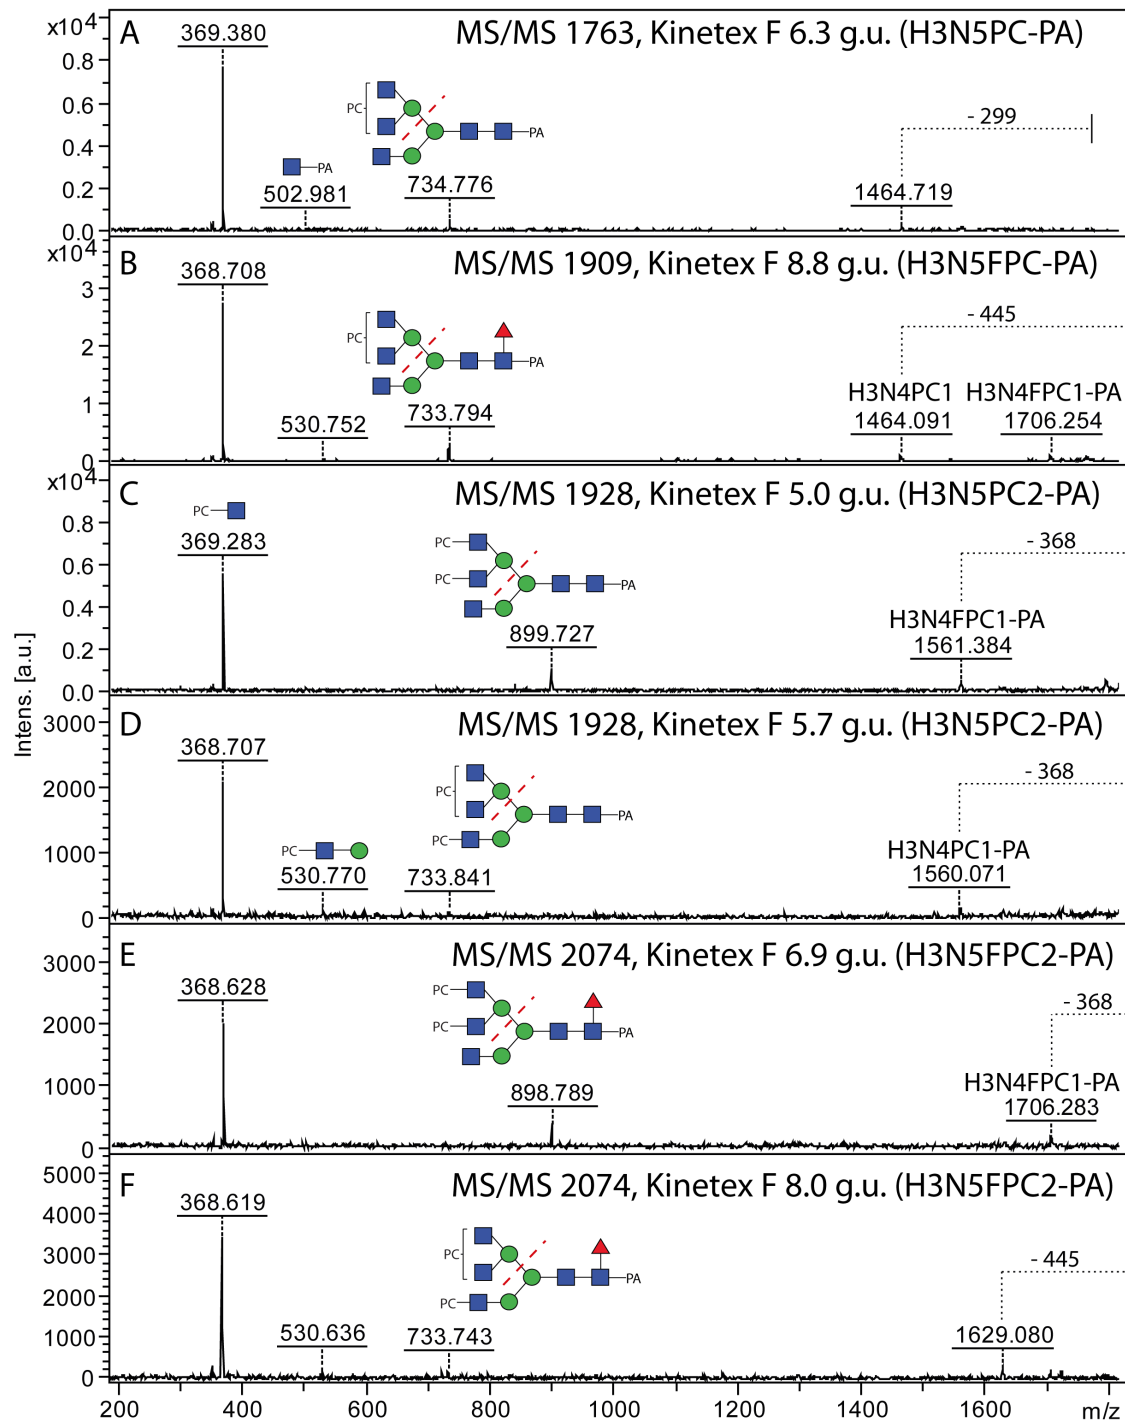

**Supplementary Figure 5. MALDI-TOF MS and MS/MS of Hex<sub>3</sub>HexNAc<sub>4</sub>PC<sub>2</sub>:** A biantennary N-glycan predicted to carry two phosphorylcholine residues (*m/z* 1725; A) was treated with hydrofluoric acid prior to MALDI-TOF MS (B); the *m/z* 1503 glycan is carried over from the neighbouring fraction (for its analysis see Figure 9 D-F of the main text). The products are primarily present as sodiated adducts, but the protonated ions are annotated. MS/MS of the original glycan (C) shows phosphorylcholine-containing fragments of *m/z* 369 and 531 GlcNAc (Hex<sub>0-1</sub>HexNAc<sub>1</sub>PC<sub>1</sub>) compatible with phosphorylcholine modification of non-reducing terminal.

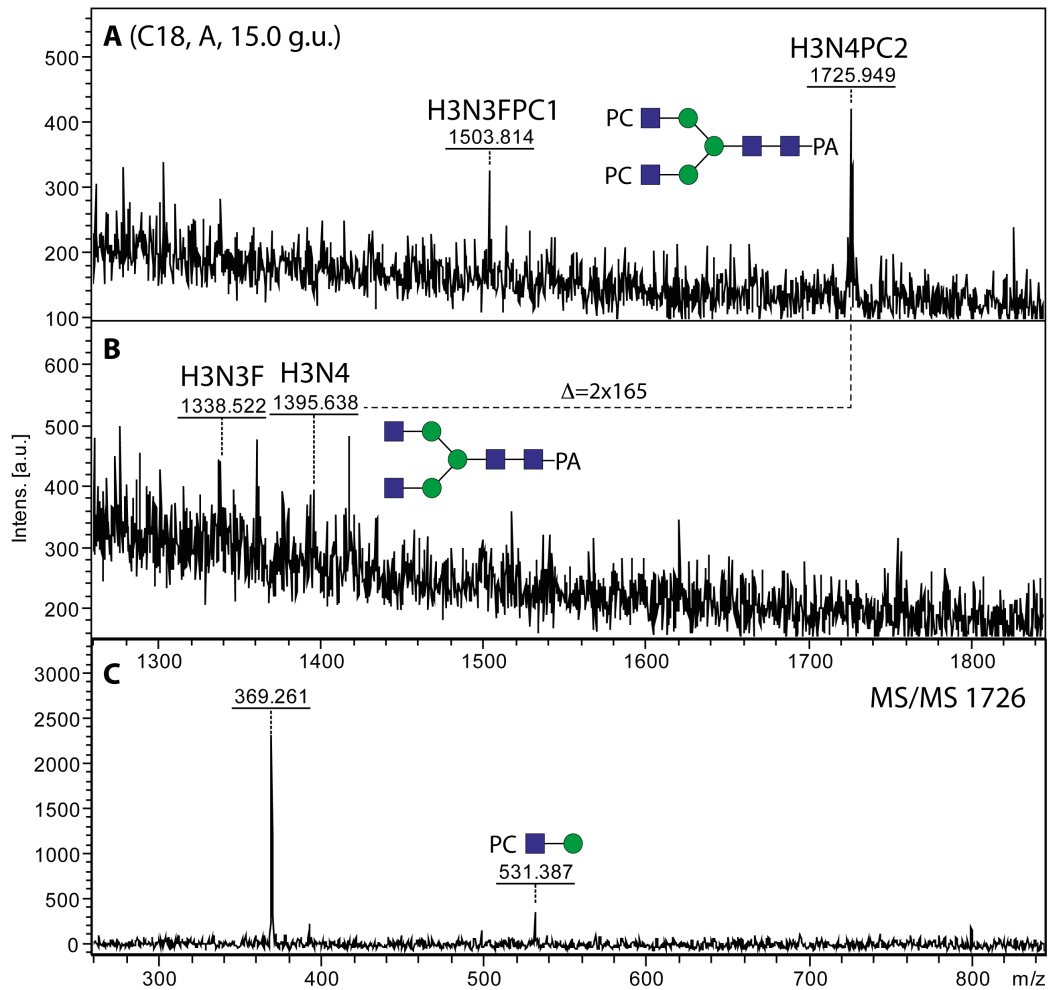

### Supplementary Figure 6. Chemical treatment of a phosphorylcholine-modified N-glycan:

A triantennary core fucosylated N-glycan predicted to carry three phosphorylcholine residues (A) was treated with hydrofluoric acid prior to MALDI-TOF MS (B). MS/MS of the original glycan (C) and of the intermediate (D) and final products (E) show the dominance of the phosphorylcholine-containing fragments ( $m/z$  369, 530, 734 and 898); only with the final product is the fragment diagnostic of the core fucose ( $m/z$  446) observed.

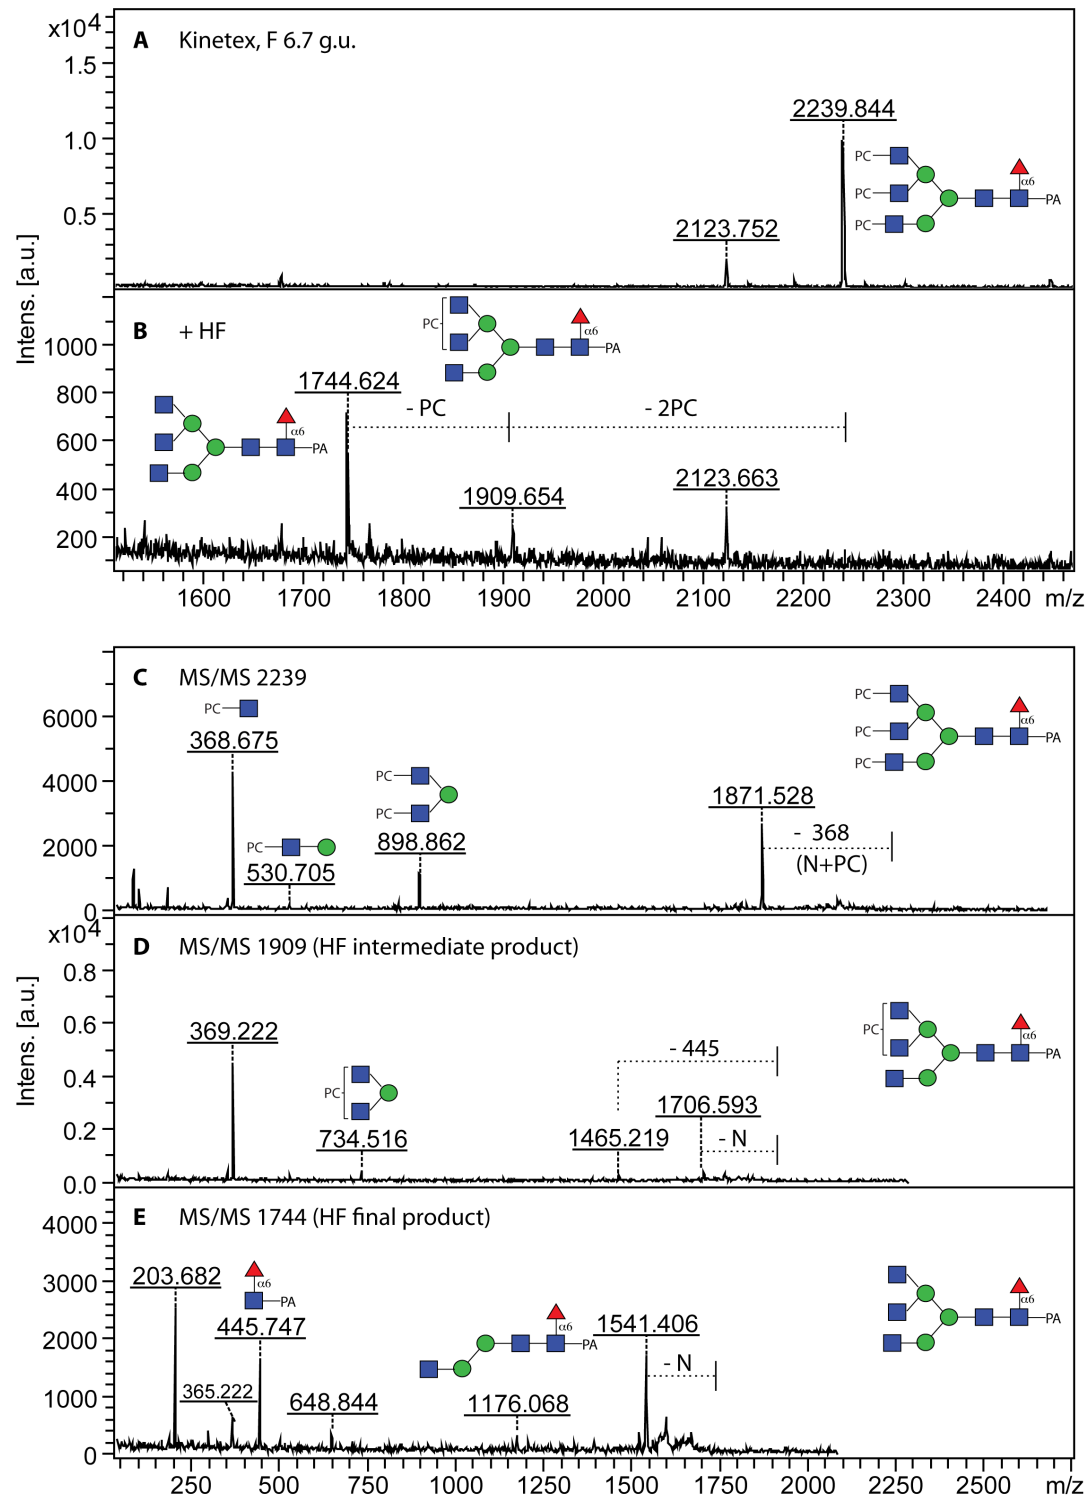

**Supplementary Table. Summary of evidence for the proposed structures of *Pristionchus* N-glycans.** An extended version of Table 1 (see main text) is presented with brief summaries of the evidence for the proposed structures referring also to relevant figures, supplementary figures and citations. Retention times for the three glucosylated N-glycans (Glc<sub>1-3</sub>Man<sub>9</sub>GlcNAc<sub>2</sub>; not shown for reasons of space in Table 1) are also included.

| Structure | <i>m/z</i>                 | Retention time |          |          | Evidence                                                                                                                                                                       |
|-----------|----------------------------|----------------|----------|----------|--------------------------------------------------------------------------------------------------------------------------------------------------------------------------------|
|           |                            | RPC18          | RP-amide | Kinetex  |                                                                                                                                                                                |
|           | 665.28                     | A/F 6.4        | A/F 6.2  | F 7.8    | Based on biosynthetic pathways Tomiya, <i>et al.</i> (1991) <i>Anal Biochem</i> <b>193</b> , 90; 6.60 g.u.                                                                     |
|           | 811.35                     | A 4.3          | A 4.3    | A 4.9    | Only found in PNGase A released pool. Key fragment: 446 [suppl. Fig 3A]                                                                                                        |
|           | 811.35                     | A/F 7.7        | F 7.5    | A/F 11.5 | Trace amount of 446 fragment due to rearrangement [suppl. Fig 3B]                                                                                                              |
|           | 811.35                     | A/F 10.3       | A/F 8.2  | A/F 13.5 | [Fig 3E and F] Key fragment: 446 [suppl. Fig 3C]                                                                                                                               |
|           | 827.34 (0M)                | A/F 5.9        | A/F 6.1  | A/F 7.5  | [Fig 3B, sensitive to alpha-1,2/3 mannosidase] Tomiya, <i>et al.</i> (1991); 6.59 g.u.                                                                                         |
|           | 827.34 (M0)                | A/F 7.7        | A/F 7.2  | A/F 9.5  | Tomiya, <i>et al.</i> (1991); 7.40 g.u. Sensitive to alpha-1,6 mannosidase                                                                                                     |
|           | 957.40                     | A 5.9          | n.d.     | A 6.8    | Only found in PNGase A released pool. Key fragment: 446 [suppl. Fig 3D]                                                                                                        |
|           | 957.40                     | A 7.0          | A 6.3    | A 8.3    | Only found in PNGase A released pool. Key fragment: 592 [suppl. Fig 3E] [also Fig 3I]                                                                                          |
|           | 957.40                     | n.d.           | A 8.7    | F > 25.0 | Key fragment: 446 [suppl. Fig 3F]                                                                                                                                              |
|           | 971.42                     | A 19.0         | A 9.5    | A >25    | Only found in PNGase A released pool. Key fragments: 446 and 606 [Fig 5E and F, sensitive to bovine fucosidase and HF]                                                         |
|           | 973.40 (0MF <sup>3</sup> ) | A 4.2          | A 4.5    | A 4.7    | Only found in PNGase A released pool. Key fragment: 446 [suppl. Fig 3G]                                                                                                        |
|           | 973.40 (M0F <sup>3</sup> ) | A 5.0          | A 5.0    | A 5.5    | Only found in PNGase A released pool. Key fragment: 446 [suppl. Fig 3H] Sensitive to alpha-1,6 mannosidase                                                                     |
|           | 973.40                     | A/F 7.7        | F 7.2    | A/F 10.2 | [Suppl. Fig 2 F and G, resistant to bovine fucosidase but sensitive to HF] Sensitive to alpha-1,2/3 mannosidase Key fragment: trace 446, due to re-arrangement [suppl. Fig 3I] |
|           | 973.40 (0MF <sup>6</sup> ) | A/F 9.8        | A/F 8.2  | A/F 13   | Key fragment: 446 [suppl. Fig 3J] [Fig 3D, sensitive to alpha-1,2/3 mannosidase] Sensitive to bovine fucosidase                                                                |
|           | 973.40 (M0F <sup>6</sup> ) | A/F 13.0       | A/F 9.0  | A/F 16   | Key fragment: 446 [suppl. Fig 3K] Sensitive to bovine fucosidase                                                                                                               |

|  |                                            |          |         |          |                                                                                                                                                                                                                      |
|--|--------------------------------------------|----------|---------|----------|----------------------------------------------------------------------------------------------------------------------------------------------------------------------------------------------------------------------|
|  | 989.39 (MM)                                | A/F 7.2  | A/F 7.2 | A/F 9.5  | Tomiya, <i>et al.</i> (1991); 7.39 g.u.<br>[Fig 3J, sensitive to $\alpha$ 1,2/3 mannosidase]<br>Trimannosyl core structure as found in many invertebrates                                                            |
|  | 1030.42 (0Gn)                              | A/F 6.5  | A/F 6.1 | A/F 7.5  | [Fig 7B, sensitive to FDL]                                                                                                                                                                                           |
|  | 1119.46                                    | A 5.2    | A 5.4   | A 6.8    | Only found in PNGase A released pool.<br>Key fragment: 446<br>Sensitive to $\alpha$ 1,2/3 mannosidase                                                                                                                |
|  | 1119.46                                    | A 7.0    | A 6.3   | A 8.3    | Only found in PNGase A released pool.<br>[Fig 3J, sensitive to $\alpha$ 1,2/3 mannosidase]<br>Key fragment: 592 [Fig 4D]                                                                                             |
|  | 1119.46                                    | F 13.0   | n.d.    | F >25.0  | Key fragments: 446 [Fig 4E]<br>Sensitive to bovine fucosidase                                                                                                                                                        |
|  | 1135.45 (MMF <sup>3</sup> )                | A 5.0    | A 5.1   | A 5.5    | Only found in PNGase A released pool.<br>Key fragment: 446 [Fig 4A]<br>HF sensitive [Suppl. Fig. 2B]                                                                                                                 |
|  | 1135.45 (MMF <sup>6</sup> )                | A/F 11.5 | A/F 9.5 | A/F 16.0 | Key fragment: 446 [Fig 4B]<br>Tomiya, <i>et al.</i> (1988) 10.2 g.u.<br>[Fig 6D and E, sensitive to $\alpha$ 1,2/3 mannosidase and bovine fucosidase; also Suppl. Fig. 2D]                                           |
|  | 1176.48                                    | n.d.     | F 8.2   | F 13.0   | Based on structure of m/z 1030<br>Key fragment: 446<br>Elution shift as compared to 1030 caused by core $\alpha$ 1,6-fucose                                                                                          |
|  | 1151.45                                    | A/F 7.2  | A/F 7.2 | A/F 9.5  | [Fig 6H, sensitive to $\alpha$ 1,2/3 mannosidase]<br>Fits order of Golgi mannosidase II:<br>Rose (2012) <i>Curr Opin Struc Biol</i> 22, 558<br>Elution: Tomiya, <i>et al.</i> (1991); 7.49 g.u.<br>Key fragment: 827 |
|  | 1192.47 (MGn)                              | A/F 7.0  | A/F 6.8 | A/F 8.4  | [Fig 3J, resistant to $\alpha$ 1,2/3 mannosidase]<br>[Fig 7B, sensitive to FDL]<br>For elution see also: Gutternigg, <i>et al.</i> (2007) <i>J Biol Chem</i> 282, 27825                                              |
|  | 1192.47 (GnM)                              | A/F 10.3 | A/F 9.0 | F/A 16.0 | [Fig 3F and Fig 7D, sensitive to $\alpha$ 1,2/3 mannosidase]<br>Resistant to FDL<br>For elution see: Gutternigg, <i>et al.</i> (2007)                                                                                |
|  | 1195.47                                    | A/F 7.7  | A/F 5.5 | A/F 6.9  | Based on structure of m/z 1030<br>Due to PC, C18 elution later and Kinetex/amide elution earlier<br>Key fragments: 369; 531; HF sensitive                                                                            |
|  | 1265.51                                    | A 8.0    | A 6.8   | A 9.2    | Only found in PNGase A released pool.<br>Key fragments: 446 and 592 [Fig 4H]<br>[Fig 6H and I, sensitive to $\alpha$ 1,2/3 mannosidase and HF (loss of 2 fucose residues)]                                           |
|  | 1265.51                                    | A 9.8    | A 8.0   | A 11.2   | Only found in PNGase A released pool.<br>Key fragments: 446; 592 [Fig 6J]<br>[Fig 6K, sensitive to HF, loss of 308 and 146]                                                                                          |
|  | 1281.51 (MMF <sup>3</sup> F <sup>6</sup> ) | A 7.2    | A 6.8   | A 8.5    | Only found in PNGase A released pool.<br>[Fig 5B and C, sensitive to bovine fucosidase and HF, loss of 1 fucose residue]<br>Key fragments: 446 and 592                                                               |
|  | 1297.50                                    | A 5.0    | A 5.0   | A 5.8    | Only found in PNGase A released pool.<br>Resistant to $\alpha$ 1,6 mannosidase<br>Based on structure of Man4GlcNAc2<br>Key fragments: 446                                                                            |







|  |                    |           |         |         |                                                                                                                                                                                                                                                                             |
|--|--------------------|-----------|---------|---------|-----------------------------------------------------------------------------------------------------------------------------------------------------------------------------------------------------------------------------------------------------------------------------|
|  | 1799.66<br>(Man8A) | A/F 5.3   | F 5.8   | A/F 6.0 | Key fragment: 989<br>Tomiya, <i>et al.</i> (1991); 5.65 g.u.<br>[Suppl. Fig. 1]                                                                                                                                                                                             |
|  | 1871.72            | A/F >20   | F 8.6   | F 14.5  | Key fragments: 369; 531<br>Based on 1725; later elution caused by core alpha1,6-fucose.                                                                                                                                                                                     |
|  | 1909.75            | n.d.      | F 6.8   | F 8.8   | Key fragments: 369; 531; 734<br>[Suppl. Fig. 4B]<br>Elution shift as compared to 1763 caused by core alpha1,6-fucose                                                                                                                                                        |
|  | 1928.74            | F 17.0    | F 4.0   | F 5.0   | Key fragments: 369; 899<br>[Suppl. Fig. 4C]                                                                                                                                                                                                                                 |
|  | 1928.74            | n.d.      | n.d.    | F 5.7   | Key fragments: 369; 531; 734<br>[Suppl. Fig. 4D]                                                                                                                                                                                                                            |
|  | 1961.71<br>(Man9)  | A/F 4.9   | A/F 5.5 | A/F 5.3 | Tomiya, <i>et al.</i> (1991); 5.33 g.u.<br>Key fragment: 1151<br>Biosynthesis: typical Man9 resulting after action of glucosidases I and II on typical transferred Glc3Man9GlcNAc2                                                                                          |
|  | 2074.80            | F > 20.0  | n.d.    | F 6.9   | Key fragments: 369; 899<br>[Suppl. Fig. 4E]<br>Elution shift as compared to 1928 caused by core alpha1,6-fucose                                                                                                                                                             |
|  | 2074.80            | n.d.      | F 6.3   | F 8.0   | Key fragments: 369; 734<br>[Suppl. Fig. 4F]<br>Elution shift as compared to 1928 caused by core alpha1,6-fucose                                                                                                                                                             |
|  | 2093.80            | A/F >20.0 | A/F 4.0 | F 4.8   | Key fragments: 369; 899 [Fig 8F]<br>Sensitive to HF, loss of three PC residues [Fig 9H]                                                                                                                                                                                     |
|  | 2123.76            | F 6.0     | F 6.6   | F 6.7   | Biosynthetic pathways<br>Key fragment: 1313<br>Tomiya, <i>et al.</i> (1991); 6.29 g.u.<br>Shift to later retention time as compared to Man9 observed for proven glycan from <i>Dictyostelium</i> M31 mutant (Hykollari <i>et al.</i> (2014) <i>Electrophoresis</i> 35, 2116 |
|  | 2239.86            | F >20.0   | F 4.5   | F 6.7   | Key fragments: 369; 899<br>Sensitive to HF, loss of three PC residues; after HF, fragmentation as for 1744 with strong 446 fragment indicative of core alpha1,6-Fuc [Suppl. Fig 6]                                                                                          |
|  | 2285.81            |           | F 6.3   | F 6.6   | Biosynthetic pathways (trace amount)<br>Key fragment: 1475<br>Shift to later retention time as compared to Man9 observed for proven glycan from <i>Dictyostelium</i> M31 mutant (Hykollari <i>et al.</i> (2014) <i>Electrophoresis</i> 35, 2116                             |
|  | 2447.86            |           | F 6.5   | F 6.9   | Biosynthetic pathways (trace amount)<br>Key fragment: 1637                                                                                                                                                                                                                  |
